# Supplementary material for: Polyaniline-tungsten oxide metacomposites with tunable electronic properties
Source: Royal Society of Chemistry journal article supplement (doi:10.1039/c0jm02090g), 2010-10-22
Supplement: c0jm02090g.pdf [file c0jm02090g.pdf]

## **Polyaniline-Tungsten Oxide Metacomposites with Tunable Electronic Properties**

Jiahua Zhu<sup>1</sup>, Suying Wei<sup>2\*</sup>, Lei Zhang<sup>1</sup>, Yuanbing Mao<sup>3</sup>, Jongeun Ryu<sup>4</sup>,  
Amar B. Karki<sup>5</sup>, David P. Young<sup>5</sup> and Zhanhu Guo<sup>1\*</sup>

<sup>1</sup>Integrated Composites Laboratory (ICL)  
Dan F Smith Department of Chemical Engineering  
Lamar University, Beaumont, TX 77710, USA

<sup>2</sup>Department of Chemistry and Biochemistry  
Lamar University, Beaumont, TX 77710, USA

<sup>3</sup>Applied Sciences laboratory, Washington State University, Spokane, WA 99210, USA

<sup>4</sup>Department of Mechanical & Aerospace Engineering, University of California Los Angeles,  
Los Angeles, CA 90095, USA

<sup>5</sup>Department of Physics and Astronomy, Louisiana State University, Baton Rouge, LA 70803,  
USA

\* Corresponding author: [zhanhu.guo@lamar.edu](mailto:zhanhu.guo@lamar.edu); Phone: (409) 880-7654  
[suying.wei@lamar.edu](mailto:suying.wei@lamar.edu); Phone: (409) 880-7976

### Supporting Materials

The crystalline structures of the NPs and NRs are determined by XRD. After running the XRD, the crystalline structure of both WO<sub>3</sub> NPs and WO<sub>3</sub> NRs are clearly identified. The XRD patterns of WO<sub>3</sub> NPs (Figure 1) match well to the monoclinic WO<sub>3</sub><sup>[1-5]</sup> and the strong intensity of the diffraction peaks indicate a highly crystalline structure. The diffraction peaks (2θ) at 23.1, 23.6, 24.4, 26.6, 28.9, 33.3, 34.2 and 36.2° are assigned to the (002), (020), (200), (120), (112), (022), (202) and (212) planes of the monoclinic WO<sub>3</sub>, respectively. The XRD patterns of the WO<sub>3</sub> NRs are highly consistent with the other work, unorthodox structure.<sup>[6]</sup> However, it is worth noting that the XRD pattern of the WO<sub>3</sub> NRs (Figure S1) is quite unusual in comparison to the WO<sub>3</sub> NPs. Preferentially oriented nanorods with limited crystal faces satisfying the Bragg requirements might be a major contribution to this unorthodox distribution of the diffraction peaks.

*The lattice elongation direction* of the WO<sub>3</sub> nanorods is clearly identified from HRTEM and SAED characterizations in prior reported work which grows along the (0002) direction.<sup>[6]</sup>

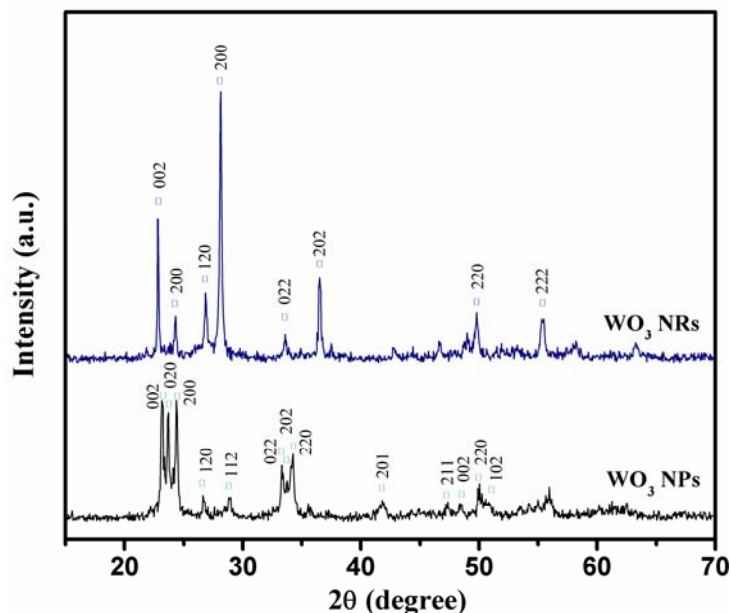

Figure S1 XRD patterns of WO<sub>3</sub> NPs and WO<sub>3</sub> NRs.

### References

1. G. Wang, Y. Ji, X. Huang, X. Yang, P.-I. Gouma and M. Dudley, *J. Phys. Chem. B*, 2006, **110**, 23777-23782.
2. V. Luca, M. G. Blackford, K. S. Finnie, P. J. Evans, M. James, M. J. Lindsay, M. Skyllas-Kazacos and P. R. F. Barnes, *J. Phys. Chem. C*, 2007, **111**, 18479-18492.
3. B. Yang, Y. Zhang, E. Drabarek, P. R. F. Barnes and V. Luca, *Chem. Mater.*, 2007, **19**, 5664-5672.
4. S. V. Pol, V. G. Pol, V. G. Kessler, G. A. Seisenbaeva, L. A. Solovyov and A. Gedanken, *Inorg. Chem.*, 2005, **44**, 9938-9945.
5. Q. Zhang, A. K. Chakraborty and W. I. Lee, *Bull. Korean Chem. Soc.*, 2009, **30**, 227-229.
6. J. Wang, E. Khoo, P. S. Lee and J. Ma, *J. Phys. Chem. C*, 2008, **112**, 14306-14312.
